# Supplementary material for: Creatinine-based Cu(II) pincer complex immobilized on UiO-66-NH 2 as an efficient catalyst for the synthesis of 1,4-dihydropyridine and 3,4- dihydropyrimidinone derivatives
Source: Research Square preprint supplement (doi:10.21203/rs.3.rs-6392038/v1), 2025-05-05
Supplement: Supplementary file 1 [file 37bba4755efbc02669670966.docx]

**Creatinine-based Cu(II) pincer complex immobilized on UiO-66-NH2 as an efficient catalyst for the synthesis of 1,4-dihydropyridine and 3,4-dihydropyrimidinone derivatives**

**Fatemeh Sharifirad,a Mohammad Mehdi Khodaei,a,b,***

aDepartment of Organic Chemistry, Razi University, Kermanshah 67149-67346, Iran.

bNanoscience & Nanotechnology Research Center (NNRC), Razi University, Kermanshah 67149-67346, Iran

**List of Figures**

**Figure S1.** 1H NMR spectrum of 6-chloro-N4N6-di(1-methyl-5H-imidazol-4-one-2-yl)1,3,5-triazine-2,4-diamine (ligand pincer).

**Figure S2.** 1H NMR spectrum of diethyl 4-(4-hydroxyphenyl)-2,6-dimethyl-1,4-dihydropyridine-3,5-dicarboxylate.

**Figure S3.** 13C NMR spectrum of diethyl 4-(4-hydroxyphenyl)-2,6-dimethyl-1,4-dihydropyridine-3,5-dicarboxylate.

**Figure S4.** 1H NMR spectrum of diethyl 4-(3-nitrophenyl)-2,6-dimethyl-1,4-dihydropyridine-3,5-dicarboxylate.

**Figure S5.** 13C NMR spectrum of diethyl 4-(3-nitrophenyl)-2,6-dimethyl-1,4-dihydropyridine-3,5-dicarboxylate.

**Figure S6.** 1H NMR spectrum of diethyl 4-(3-bromophenyl)-2,6-dimethyl-1,4-dihydropyridine-3,5-dicarboxylate.

**Figure S7.** 13C NMR spectra of diethyl 4-(3-bromophenyl)-2,6-dimethyl-1,4-dihydropyridine-3,5-dicarboxylate.

**Figure S8.** 1H NMR spectrum of 5-ethoxycarbonyl-6-methyl-4-(4-hydroxyphenyl)-3,4-dihydropyrimidin-2(1H)-one.

**Figure S9.** 13C NMR spectrum of 5-ethoxycarbonyl-6-methyl-4-(4-hydroxyphenyl)-3,4-dihydropyrimidin-2(1H)-one.

**Figure S10.** 1H NMR spectrum of 5-ethoxycarbonyl-6-methyl-4-(3,4-dimethoxyphenyl)-3,4-dihydropyrimidin-2(1H)-one.

**Figure S11.** 13C NMR spectrum of 5-ethoxycarbonyl-6-methyl-4-(3,4-dimethoxyphenyl)-3,4-dihydropyrimidin-2(1H)-one.

**Figure S12.** 1H NMR spectrum of 5-ethoxycarbonyl-6-methyl-4-(furan-2-yl)-3,4-dihydropyrimidin-2(1H)-one.

**Figure S13.** 13C NMR spectrum of 5-ethoxycarbonyl-6-methyl-4-(furan-2-yl)-3,4-dihydropyrimidin-2(1H)-one.

**Figure S14.** Leaching test of the UiO-66@Cu(II) pincer complexcatalyst.

**Figure S1.** 1H NMR spectrum of 6-chloro-N4N6-di(1-methyl-5H-imidazol-4-one-2-yl)1,3,5-triazine-2,4-diamine (pincer ligand).

1H NMR (400 MHz, DMSO-d6): δ (ppm) 7.46 (s, 2H), 3.67 (s, 4H), 2.91 (s, 6H).

**Figure S2.** 1H NMR spectrum of diethyl 4-(4-hydroxyphenyl)-2,6-dimethyl-1,4-dihydropyridine-3,5-dicarboxylate.

1H NMR (500 MHz, DMSO-d6): δ(ppm) 9.04 (s, 1H), 8.67 (s, 1H), 6.90 (dd, *J* = 8.4, 3.3 Hz, 2H), 6.55 (dd, *J* = 8.4, 3.4 Hz, 2H), 4.72 (d, *J* = 3.2 Hz, 1H), 3.95 (dtt, *J* = 18.0, 7.1, 3.5 Hz, 4H), 2.21 (d, *J* = 3.2 Hz, 6H), 1.10 (td, *J* = 7.1, 3.3 Hz, 6H).

**Figure S3.** 13C NMR spectrum of diethyl 4-(4-hydroxyphenyl)-2,6-dimethyl-1,4-dihydropyridine-3,5-dicarboxylate.

13C NMR (126 MHz, DMSO-d6): δ (ppm) 167.12, 155.44, 144.78, 138.93, 128.30, 114.53, 102.31, 58.90, 37.88, 18.22, 14.21.

**Figure S4.** 1H NMR spectrum of diethyl 4-(3-nitrophenyl)-2,6-dimethyl-1,4-dihydropyridine-3,5-dicarboxylate.

1H NMR (500 MHz, DMSO-d6): δ (ppm) 9.00 (s, 1H), 7.98 (d, *J* = 7.3 Hz, 2H), 7.60 (d, *J* = 7.5 Hz, 1H), 7.53 (d, *J* = 7.9 Hz, 1H), 4.95 (s, 1H), 3.96 (dd, *J* = 15.2, 7.2 Hz, 4H), 2.27 (s, 6H), 1.11 (m, 6H).

**Figure S5.** 13C NMR spectrum of diethyl 4-(3-nitrophenyl)-2,6-dimethyl-1,4-dihydropyridine-3,5-dicarboxylate.

13C NMR (126 MHz, DMSO): δ (ppm) 166.52, 150.32, 147.42, 146.40, 134.29, 129.59, 121.95, 121.09, 101.09, 59.23, 39.04, 18.26, 14.07.

**Figure S6.** 1H NMR spectrum of diethyl 4-(3-bromophenyl)-2,6-dimethyl-1,4-dihydropyridine-3,5-dicarboxylate.

1H NMR (500 MHz, DMSO-d6); δ (ppm) = 8.87 (s, 1H), 7.29 (s, 2H), 7.17 (m, 2H), 4.83 (d, *J* = 5.8 Hz, 1H), 4.00 (ddd, *J* = 30.5, 13.8, 6.5 Hz, 4H), 2.27 (s, 6H), 1.12 (m, 6H).

**Figure S7.** 13C NMR spectrum of diethyl 4-(3-bromophenyl)-2,6-dimethyl-1,4-dihydropyridine-3,5-dicarboxylate.

13C NMR (126 MHz, DMSO-d6): δ (ppm) = 166.70, 150.85, 145.90, 130.28, 128.75, 126.52, 124.33, 121.08, 101.36, 59.14, 40.05, 39.88, 39.71, 39.55, 39.38, 39.21, 39.12, 39.05, 18.27, 14.13.

**Figure S8.** 1H NMR spectrum of 5-ethoxycarbonyl-6-methyl-4-(4-hydroxyphenyl)-3,4-dihydropyrimidin-2(1H)-one.

1H NMR (500 MHz, DMSO-d6): δ (ppm) 9.31 (t, *J* = 2.5 Hz, 1H), 9.09 (s, 1H), 7.59 (s, 1H), 7.00 (dd, *J* = 8.5, 2.3 Hz, 2H), 6.66 (dd, *J* = 8.5, 2.3 Hz, 2H), 5.02 (d, *J* = 2.7 Hz, 1H), 3.95 (qd, *J* = 7.1, 2.3 Hz, 2H), 2.21 (d, *J* = 2.3 Hz, 3H), 1.07 (td, *J* = 7.1, 2.3 Hz, 3H).

Figure S9. 13C NMR spectra of 5-ethoxycarbonyl-6-methyl-4-(4-hydroxyphenyl)-3,4-dihydropyrimidin-2(1H)-one.

13C NMR (126 MHz, DMSO-d6): δ (ppm) 165.44, 156.56, 152.23, 147.76, 135.45, 127.43, 115.00, 99.76, 59.13, 53.46, 17.76, 14.11.

**Figure S10.** 1H NMR spectrum of 5-ethoxycarbonyl-6-methyl-4-(3,4-dimethoxyphenyl)-3,4-dihydropyrimidin-2(1H)-one.

1H NMR (500 MHz, DMSO-d6); δ (ppm) 9.33 (d, *J* = 118.1 Hz, 1H), 7.28 (s, 1H), 7.00 (s, 1H), 6.60 (s, 2H), 5.50 (s, 1H), 3.83 (s, 8H), 2.29 (s, 3H), 1.41 – 0.64 (m, 3H).

**Figure S11.** 13C NMR spectrum of 5-ethoxycarbonyl-6-methyl-4-(3,4-dimethoxyphenyl)-3,4-dihydropyrimidin-2(1H)-one.

13C NMR (126 MHz, DMSO): δ (ppm) 165.48, 159.98, 157.63, 152.37, 148.59, 127.79, 124.30, 104.46, 98.52, 59.06, 55.19, 48.62, 40.02, 39.39, 17.80, 14.15.

**Figure S12.** 1H NMR spectrum of 5-ethoxycarbonyl-6-methyl-4-(furan-2-yl)-3,4-dihydropyrimidin-2(1H)-one.

1H NMR (500 MHz, DMSO-d6); δ (ppm) 9.23 (s, 1H), 7.75 (s, 1H), 7.53 (d, J = 3.3 Hz, 1H), 6.34 (d, J = 4.0 Hz, 1H), 6.08 (t, *J* = 3.6 Hz, 1H), 5.19 (t, *J* = 3.8 Hz, 1H), 4.01 (ddq, *J* = 10.3, 7.0, 4.0, 3.2 Hz, 2H), 2.22 (d, *J* = 3.2 Hz, 3H), 1.12 (td, *J* = 7.0, 3.2 Hz, 3H).

**Figure S13**. 13C NMR spectra of 5-ethoxycarbonyl-6-methyl-4-(furan-2-yl)-3,4-dihydropyrimidin-2(1H)-one.

13C NMR (126 MHz, DMSO): δ (ppm) 165.04, 155.96, 152.45, 149.39, 142.18, 110.37, 105.31, 96.76, 59.26, 47.74, 17.76, 14.17.

**Figure S14.** Leaching test of the UiO-66@Cu(II) pincer complexcatalyst.
